# Supplementary material for: Distance measurement between trityl radicals by pulse dressed electron paramagnetic resonance with phase modulation
Source: Copernicus journal article supplement (doi:10.5194/mr-1-75-2020), 2020-05-15
Supplement: Supplementary file 2 [file mr-1-75-2020-supplement.zip]

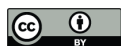

## *Supplement of*

# **Distance measurement between trityl radicals by pulse dressed electron paramagnetic resonance with phase modulation**

**Nino Wili et al.**

*Correspondence to:* Nino Wili ([nino.wili@phys.chem.ethz.ch](mailto:nino.wili@phys.chem.ethz.ch))

- [mr-1-75-2020-supplement-title-page.pdf](#)
- [supplement\\_revision\\_1](#)
  - [SI\\_partA\\_EPR.pdf](#)
  - [SI\\_partB\\_synthesis.pdf](#)

The copyright of individual parts of the supplement might differ from the CC BY 4.0 License.
